# Supplementary material for: Inflammatory Markers in Non-Obese Women with Polycystic Ovary Syndrome Are Not Elevated and Show No Correlation with Vitamin D Metabolites
Source: MDPI journal article supplement (doi:10.3390/nu14173540), 2022-08-27

# Supplementary Figure S1

25(OH)D<sub>3</sub>, no correlation with MMPs

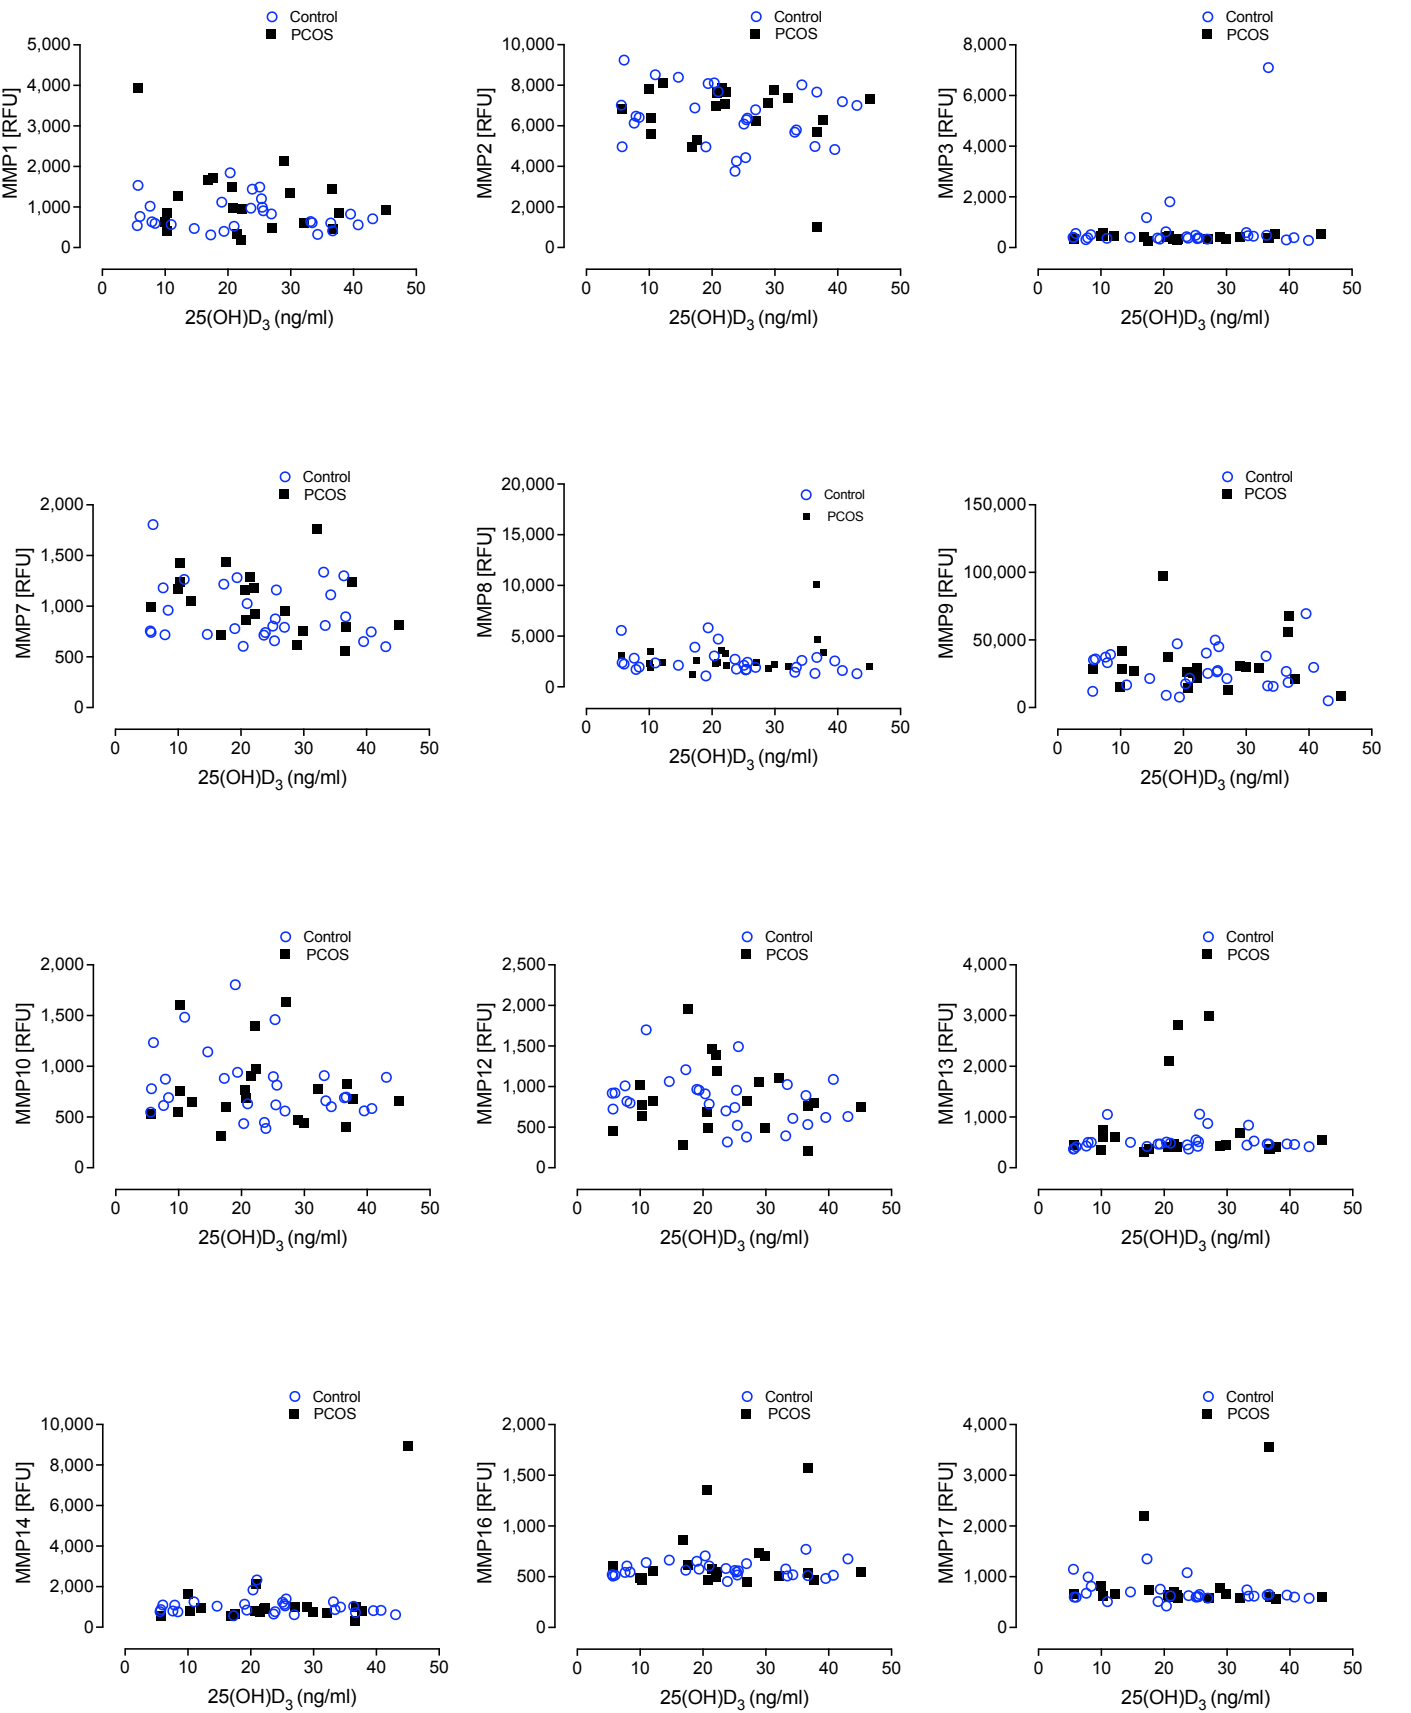

# Supplementary Figure S2

1,25(OH)<sub>2</sub>D<sub>3</sub>, no correlation with MMPs

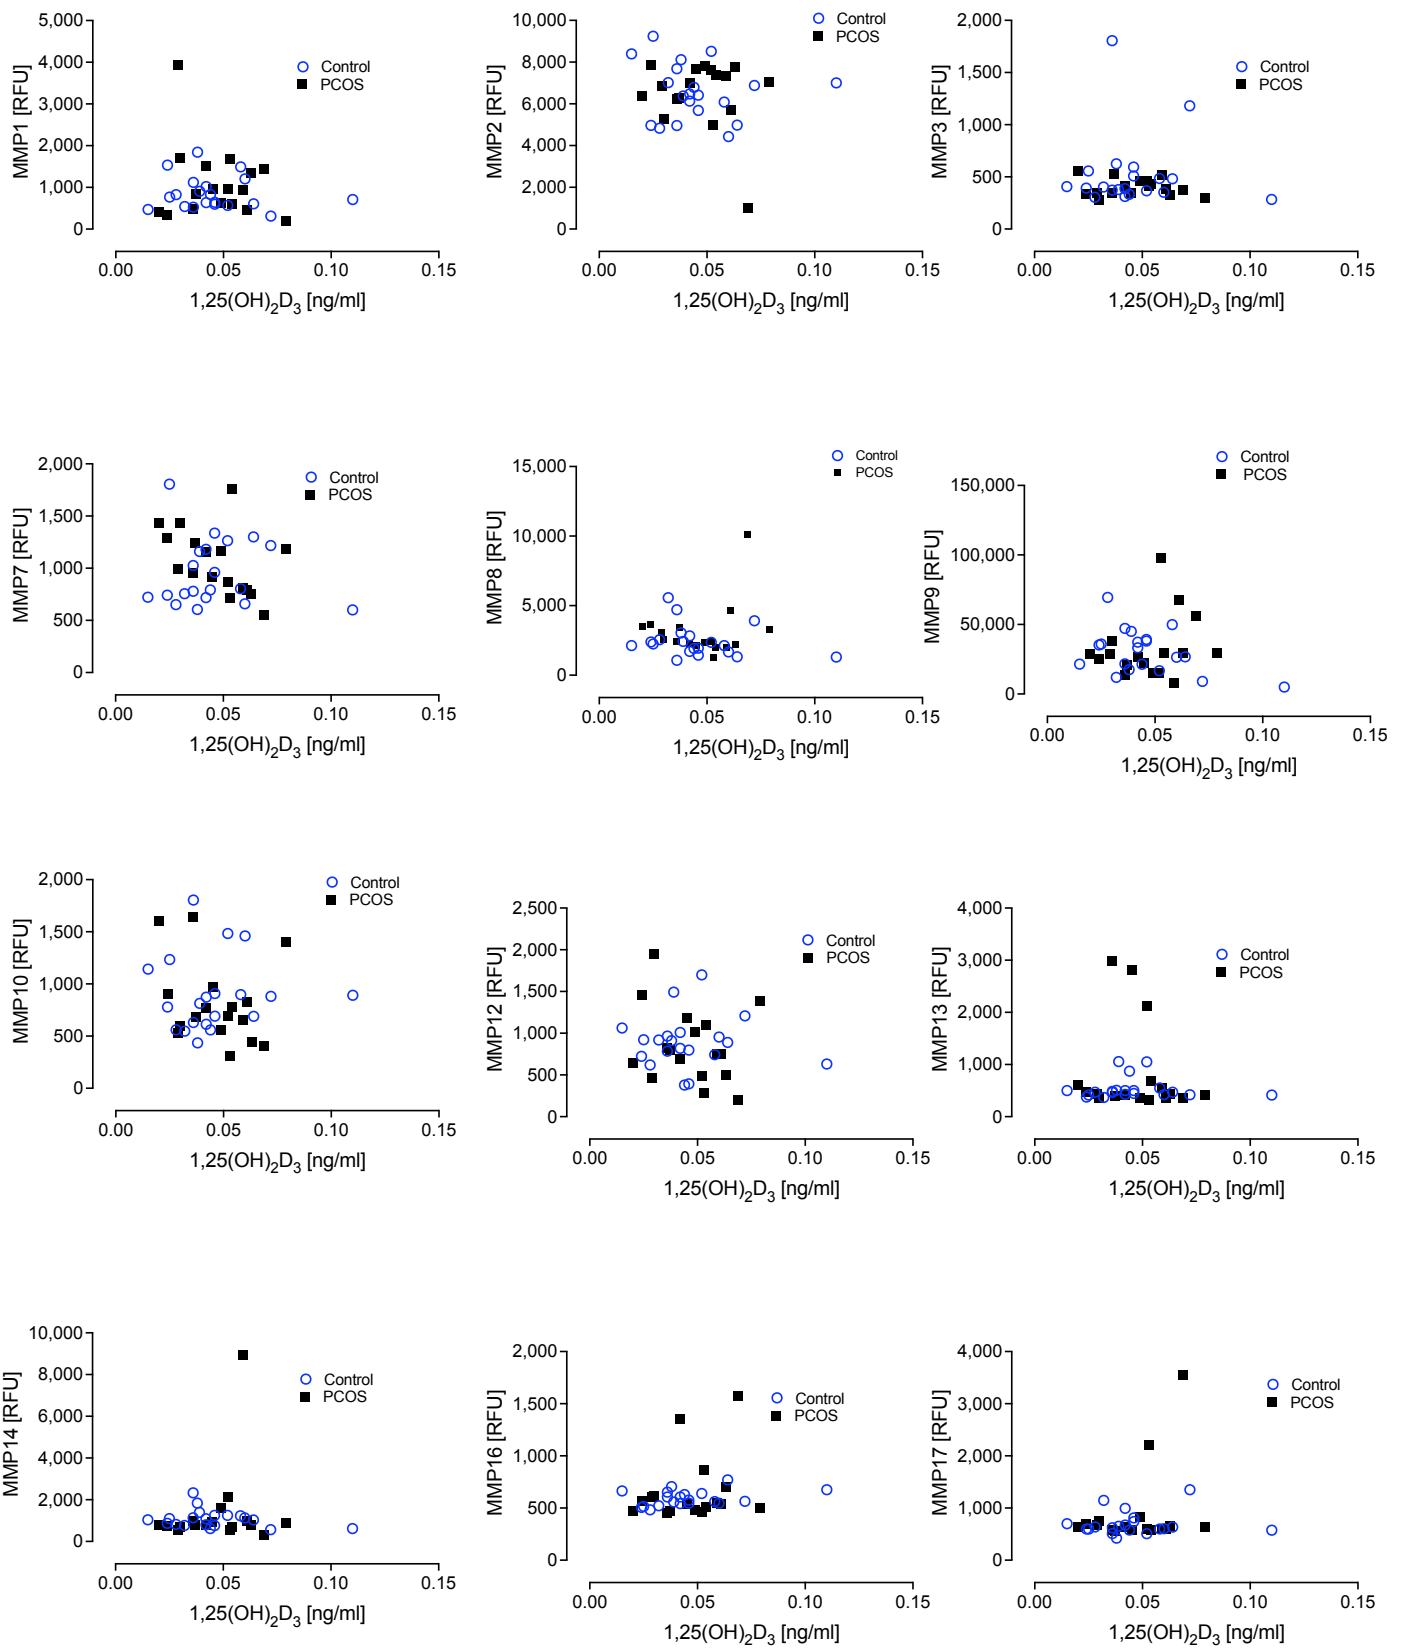

Supplement: s1 [file s1]
